# Supplementary figures and images for: Phylogeny of Transferable Oxazolidinone Resistance Genes and Homologs
Source: MDPI journal article supplement (doi:10.3390/antibiotics13040311), 2024-03-28

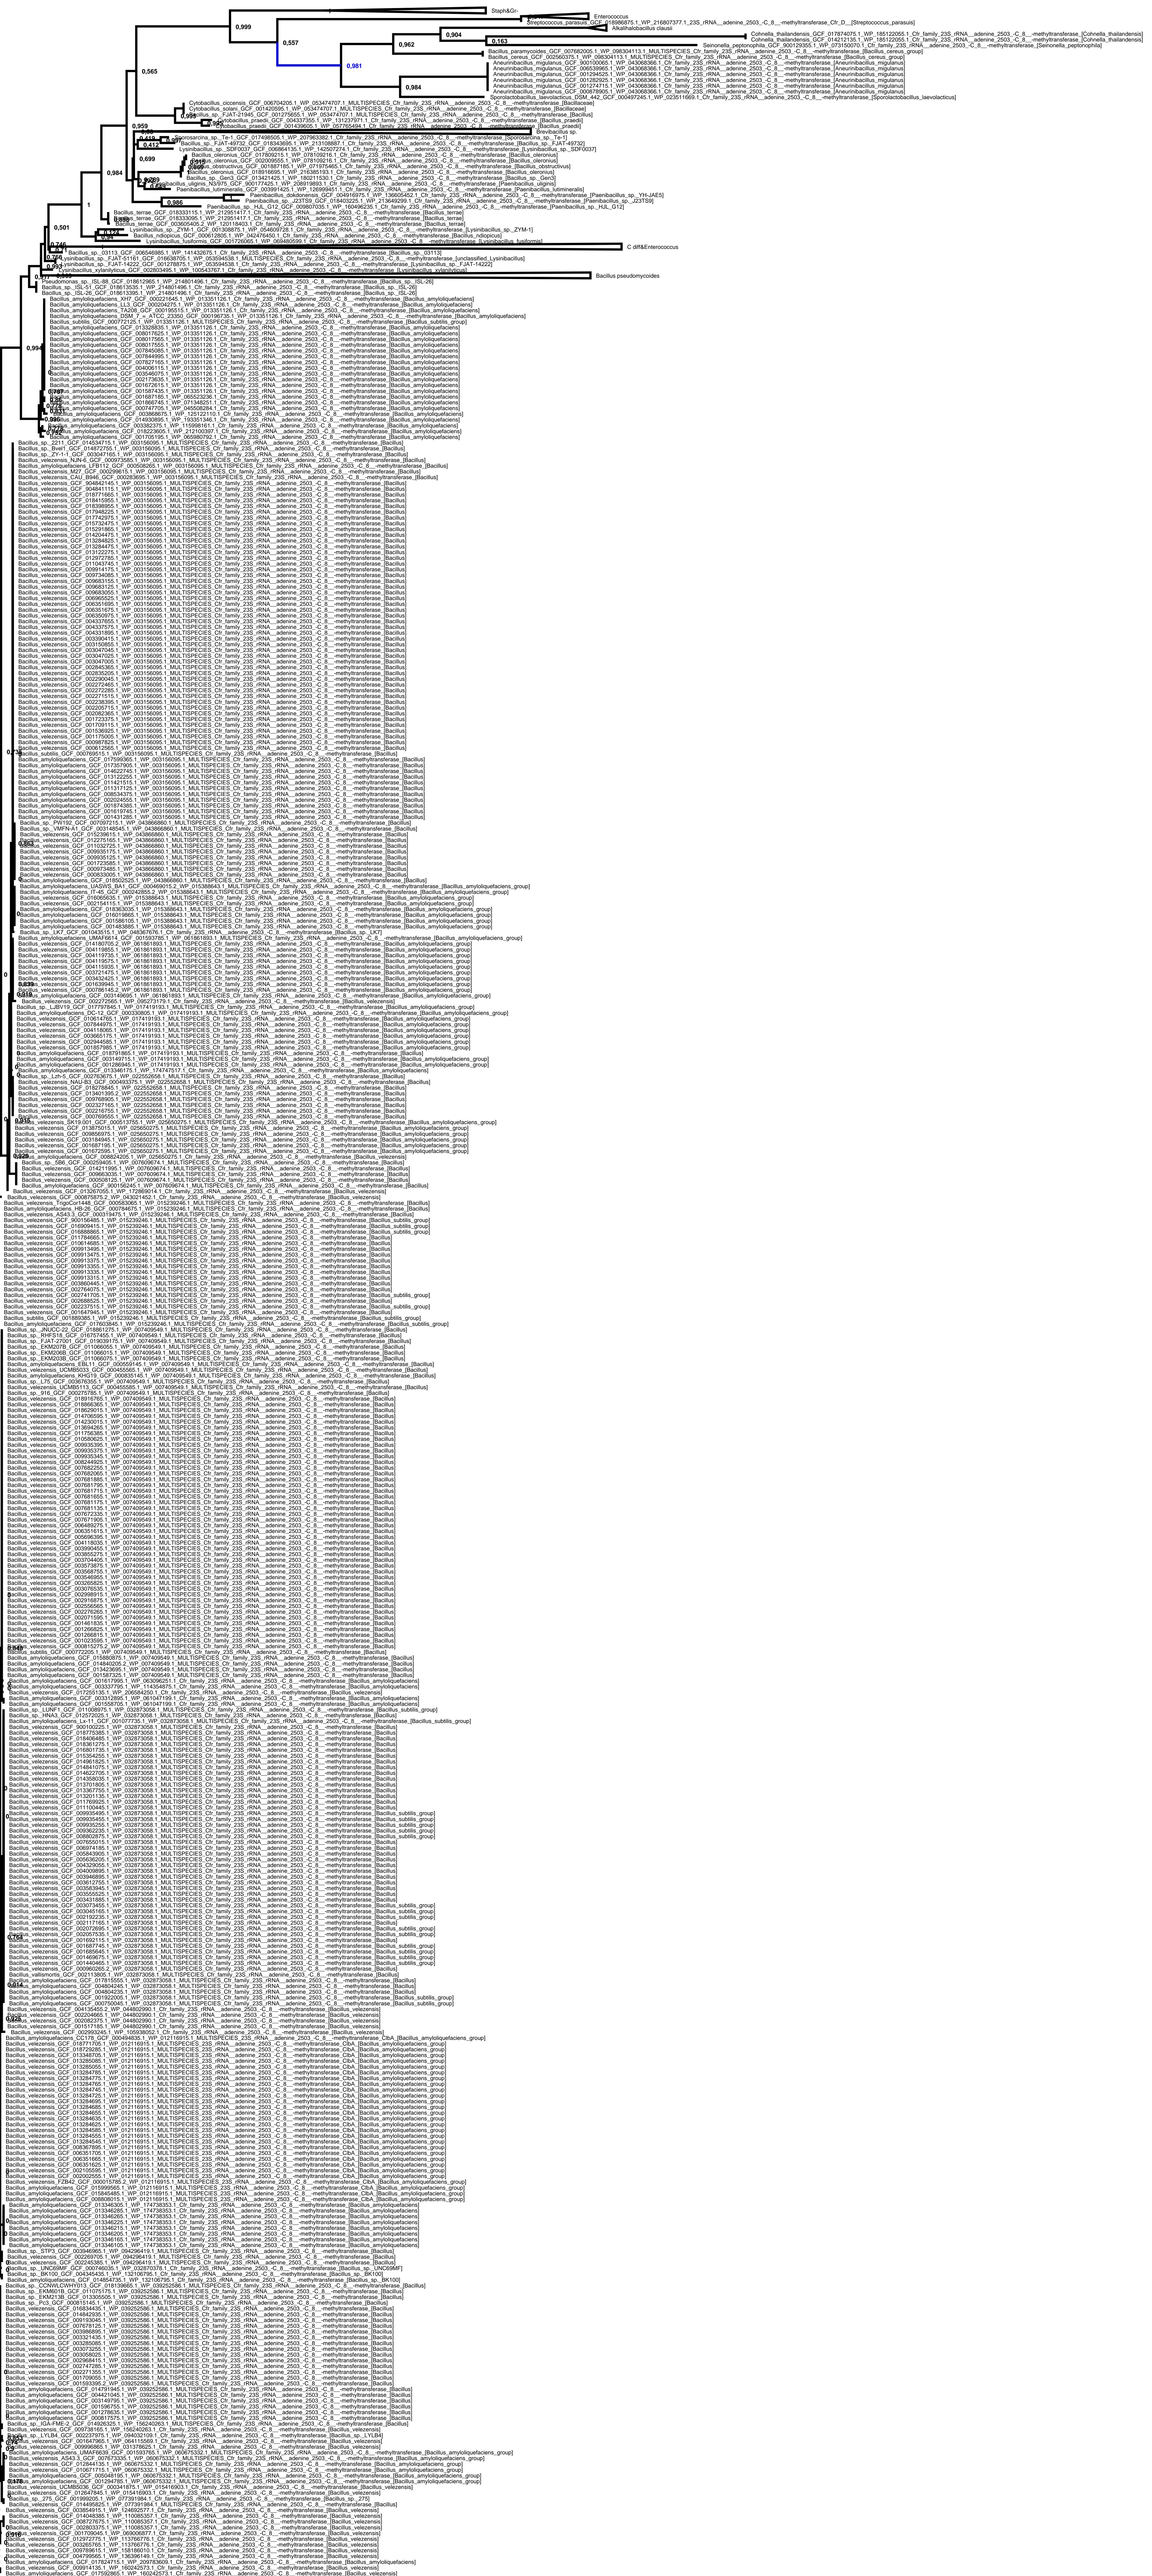

Supplement: s1 [file s1]

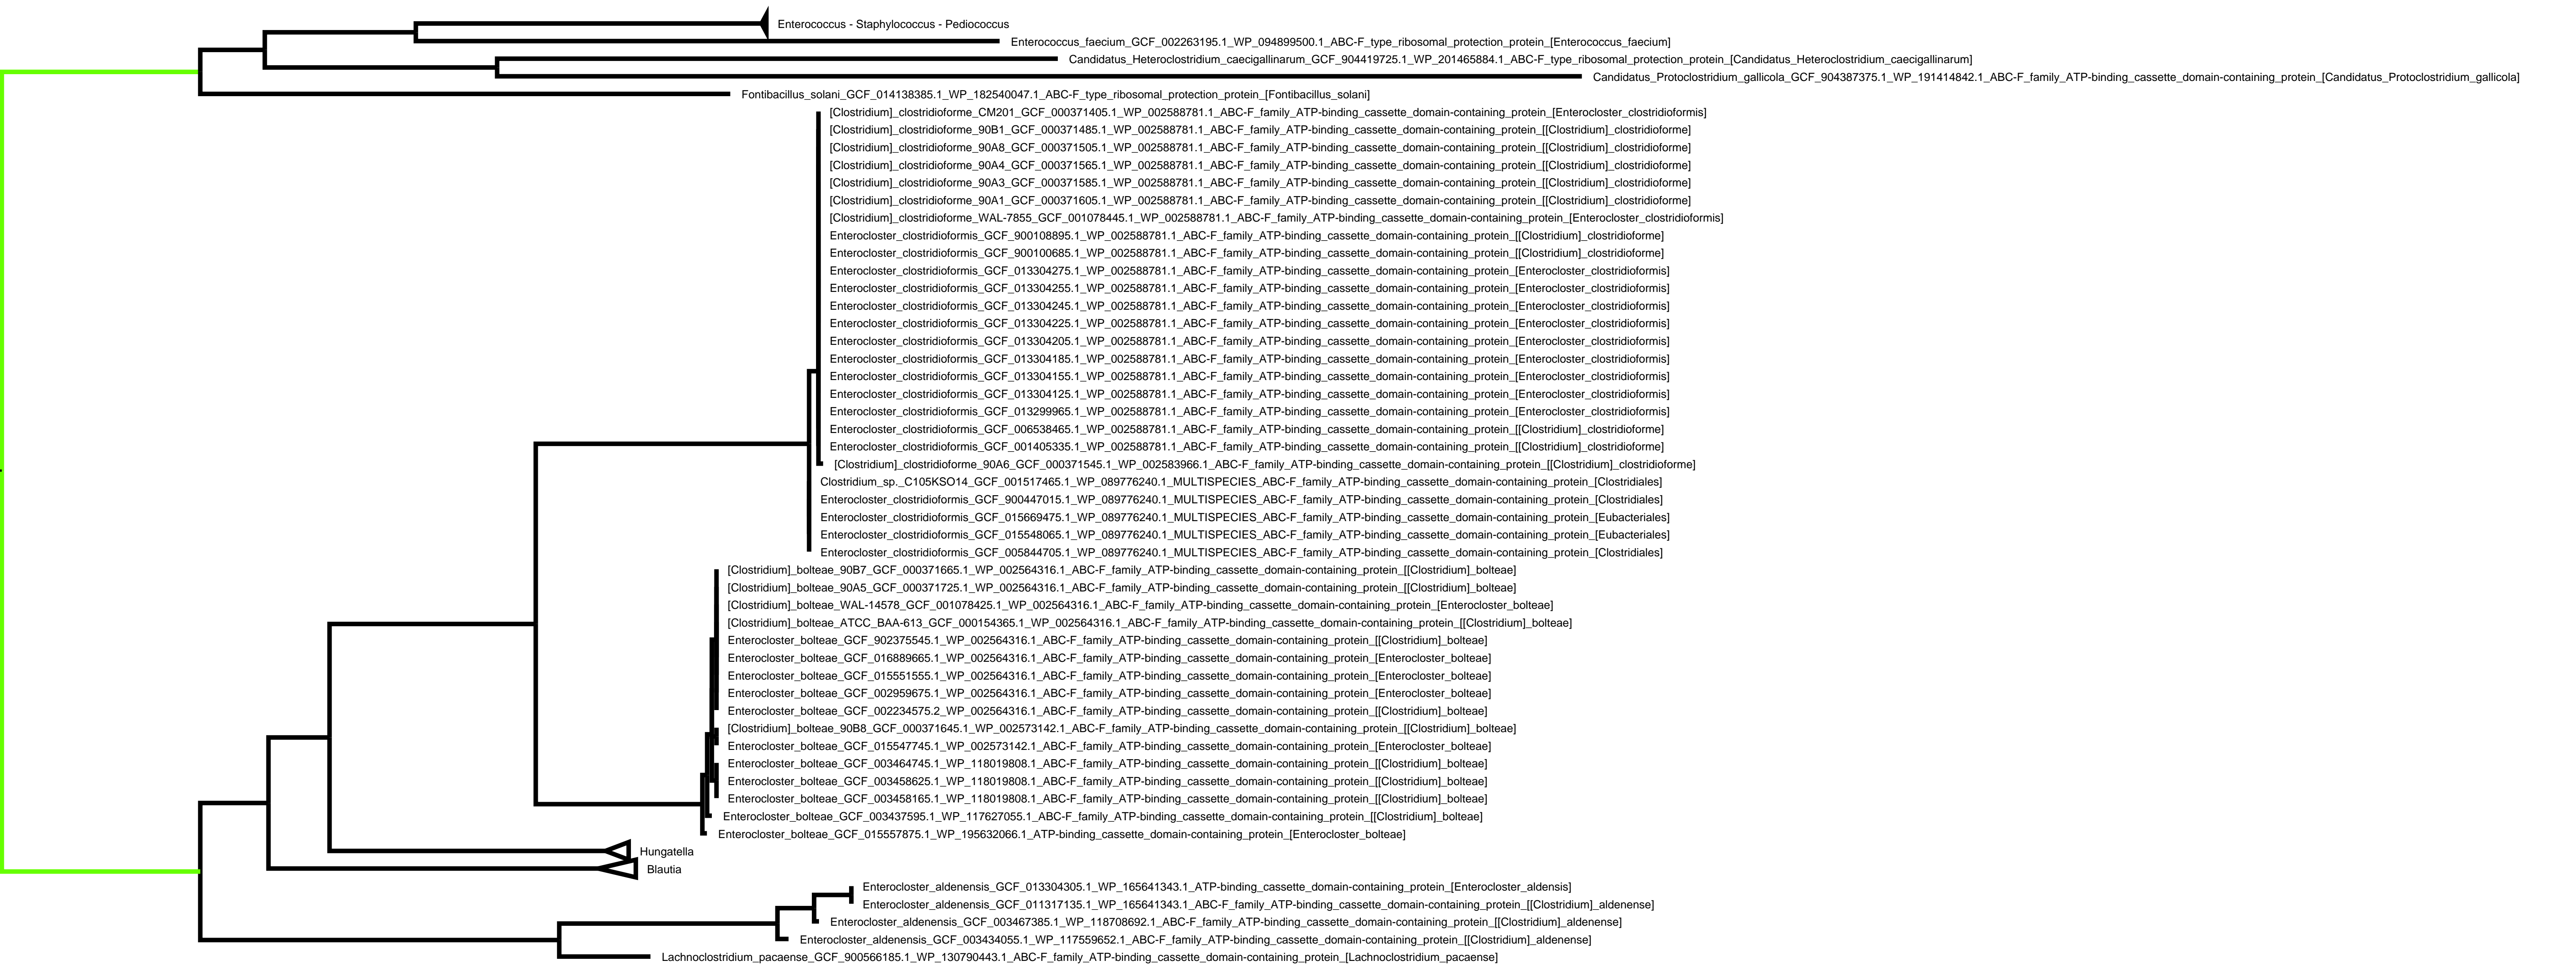

0.09

Supplement: s1 [file s1]

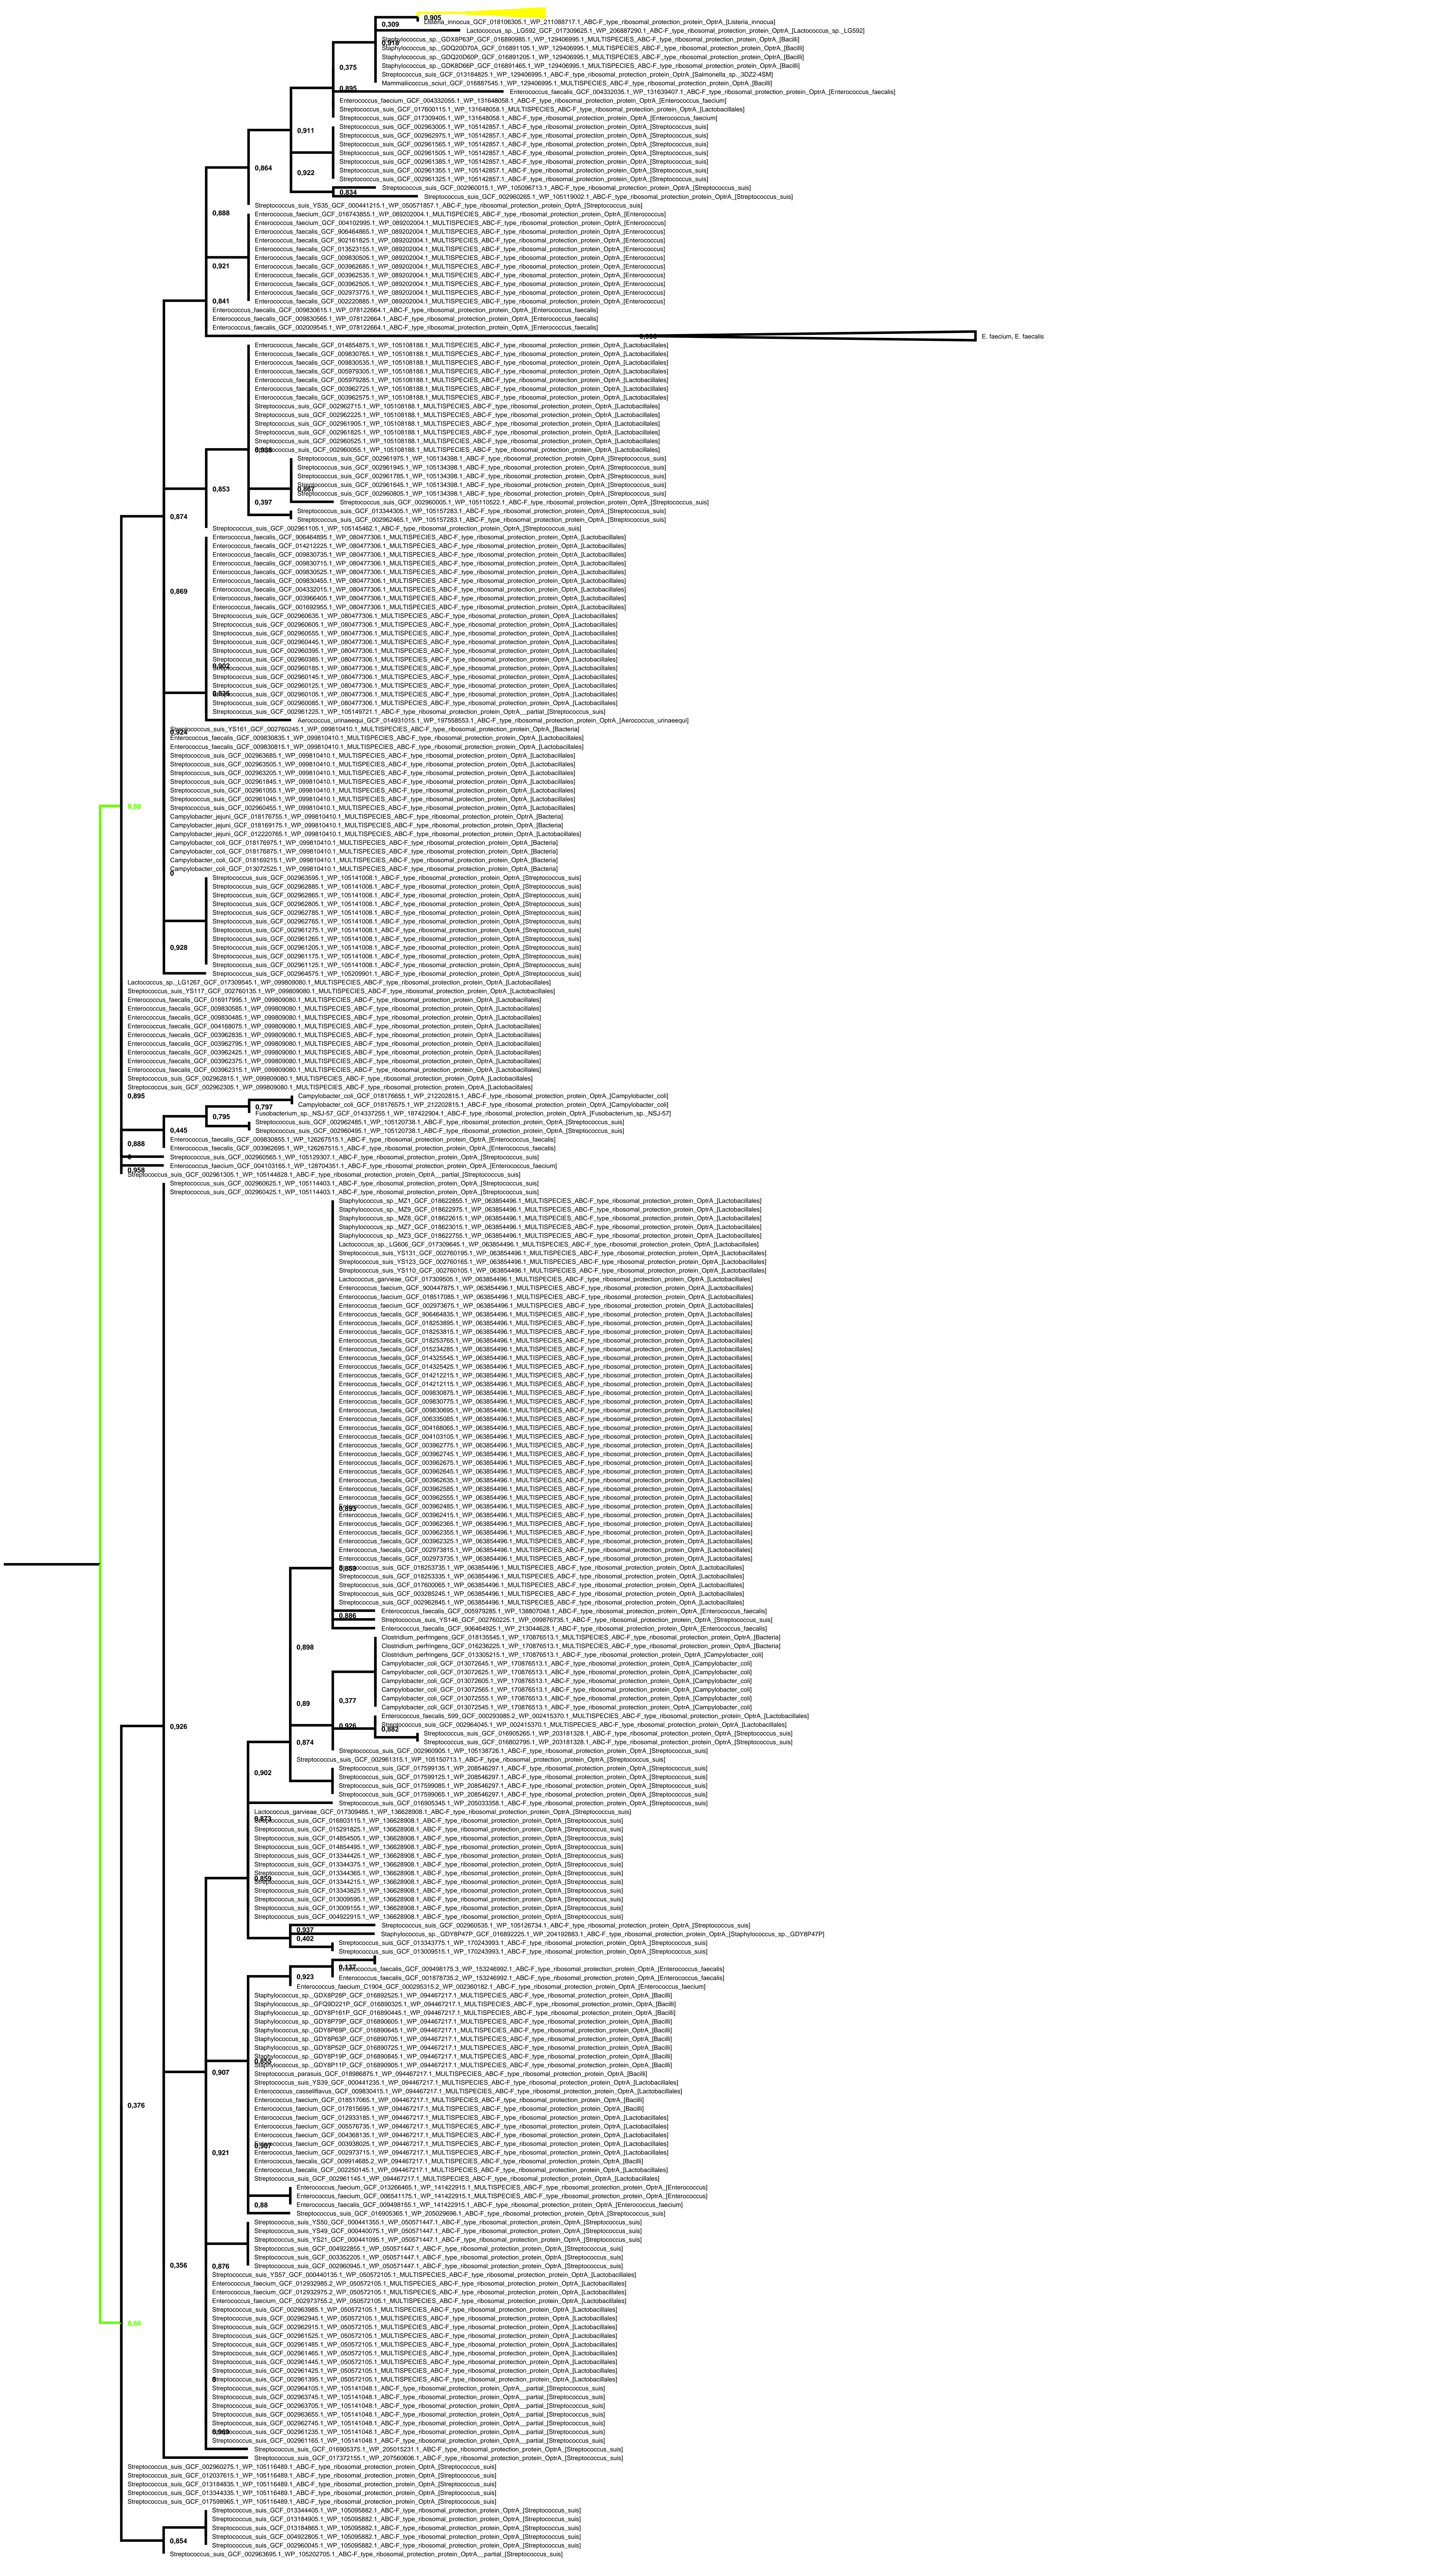

Supplement: s1 [file s1]
